# Supplementary material for: Converting an amorphous covalent organic polymer to a crystalline covalent organic framework mediated by a repairing agent
Source: Royal Society of Chemistry journal article supplement (doi:10.1039/d2cc05800f), 2023-01-01
Supplement: d2cc05800f1.pdf [file d2cc05800f1.pdf]

## Electronic Supplementary Information

### Converting an amorphous covalent organic polymer to a crystalline covalent organic framework mediated by a repairing agent

Xiang-Hao Han, Rong-Ran Liang, Zhi-Bei Zhou, Qiao-Yan Qi, and Xin Zhao\*

Key Laboratory of Synthetic and Self-Assembly Chemistry for Organic Functional Molecules, Center for Excellence in Molecular Synthesis, Shanghai Institute of Organic Chemistry, University of Chinese Academy of Sciences, Chinese Academy of Sciences, 345 Lingling Road, Shanghai 200032, China

Email: xzhao@sioc.ac.cn

#### Table of Contents

|                                                                                  |      |
|----------------------------------------------------------------------------------|------|
| Section A Instruments and General Methods .....                                  | 2-3  |
| Section B Synthesis .....                                                        | 4-6  |
| Section C Characterization of COP-DTAD, COP-DTAD-1, and COF-DTAD .....           | 7-15 |
| Section D Fractional atomic coordinates .....                                    | 16   |
| Section E <sup>1</sup> H NMR and <sup>13</sup> C NMR spectra of compound 1 ..... | 17   |

## **Section A Instruments and General Methods**

### **Nuclear magnetic resonance spectroscopy (NMR)**

$^1\text{H}$  NMR and  $^{13}\text{C}$  NMR data were recorded on a 500 MHz Agilent spectrometer with  $\text{CDCl}_3$  as the solvent.  $^1\text{H}$  chemical shifts were referenced to  $\text{CDCl}_3$  at 7.26 ppm and  $^{13}\text{C}$  chemical shifts were referenced to  $\text{CDCl}_3$  at 77.16 ppm. Multiplicities are abbreviated as follows: singlet (s), doublet (d), triplet (t), quartet (q), multiplet (m), and broad (br).

### **Fourier transform infrared spectroscopy (FT-IR)**

Fourier transform infrared spectroscopy (FT-IR) was obtained with a Nicolet iS10 spectrometer.

### **Solid-state nuclear magnetic resonance (NMR) spectroscopy**

Solid-state  $^{13}\text{C}$  cross-polarization/magic angle spinning (CP/MAS) spectra were collected on an Agilent DD2 600 Solid system equipped with a 3.2 mm HFX MAS probe. The Hartmann-Hahn conditions of the CP experiment were acquired at a 15 kHz MAS spinning speed with a contact time of 2.0 ms. The cycle time is 5 s.

### **Scanning electron microscopy (SEM)**

Scanning electron microscopy was carried out using an XL30 FEG scanning electron microscope. The samples were dispersed over a slice of conductive adhesive adhered to a flat copper platform sample holder and then coated with gold using a sputter 9 coater (ambient temperature, 85 torr pressure in a nitrogen atmosphere, sputtered for 80 s from a solid gold target at a current of 20 mA) before being submitted to SEM characterization.

### **Thermal gravimetric analysis (TGA)**

Thermal gravimetric analysis was performed on Waters TGA Q500 by heating the samples from 25 to 1000 °C under  $\text{N}_2$  atmosphere at a heating rate of 10 °C /min.

### **Powder X-ray diffraction (PXRD)**

Powder X-ray diffraction measurements were carried out with an X'Pert PROX system using monochromated Cu/K $\alpha$  ( $\lambda = 0.1542$  nm). Each sample was spread on the square recess of a XRD sample holder as a thin layer.

### **Nitrogen adsorption-desorption isotherm measurements**

The measurements were carried out using a Quantachrome Autosorb-IQ instrument or a Micromeritics ASAP 2020 system. Before gas adsorption measurements, the as-prepared samples (~50 mg) were activated by being immersed in anhydrous THF for 12 h. The solvent was decanted and the samples were dried under dynamic vacuum at 160 °C for 6 h. The resulting samples were then used for gas adsorption measurements from 0 to 1 atm at 77 K. The Brunauer-Emmett-Teller (BET) method was utilized to calculate the specific surface areas. By using the non-local density functional theory model, the pore size distributions were derived from the adsorption data.

### **Structural simulations and powder X-ray diffraction analysis**

Structural modeling was carried out using the Materials Studio 7.0. The predicted structures with eclipsed (AA) and staggered (AB) stacking models were firstly optimized in geometry optimizations by the Forcite molecular dynamics module method, after which the simulated PXRD patterns were determined by the Reflex module. The Pawley refinement of the experimental PXRD was conducted by the Reflex module.

## Section B Synthesis

**Materials:** All the anhydrous solvents were purchased from Sigma-Aldrich or Alfa Chemicals Inc. All the chemicals and solvents were reagent grades and purchased from Aldrich, TCI, Macklin or other chemical companies and used without further purification.

Synthetic route:

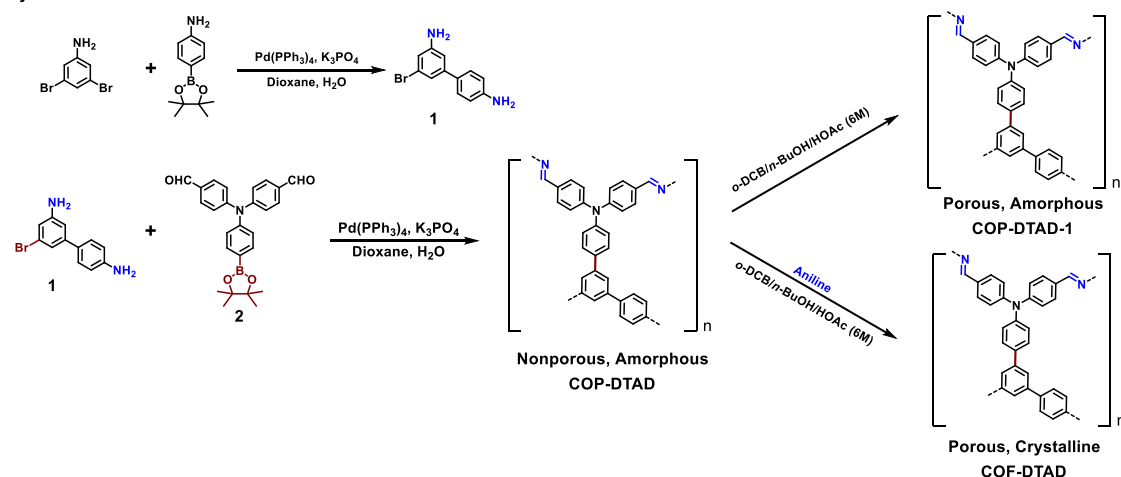

**5-bromo-[1,1'-biphenyl]-3,4'-diamine (compound 1):** To a mixture of 3,5-dibromoaniline (5.0 g, 20.0 mmol),  $K_3PO_4$  (8.6 g, 40.5 mmol),  $Pd(PPh_3)_4$  (0.60 g, 0.52 mmol) and 4-(4,4,5,5-tetramethyl-[1,3,2]dioxaborolan-2-yl)aniline (2.94 g, 13.4 mmol), a degassed mixture of 1,4-dioxane (180 mL) and  $H_2O$  (8 mL) was added. The mixture was heated at 90 °C for 24 h under the protection of nitrogen. After being cooled to room temperature, the solvent was removed under vacuum and the residue was purified by flash column chromatography to give a light gray solid (2.06 g, 56%).  $^1H$  NMR (500 MHz,  $CDCl_3$ )  $\delta$  7.34 (d,  $J$  = 8.5 Hz, 2H), 7.06 (s, 1H), 6.74 (d,  $J$  = 1.3 Hz, 2H), 6.72 (d,  $J$  = 8.5 Hz, 2H), 3.74 (s, 4H).  $^{13}C$  NMR (126 MHz,  $CDCl_3$ )  $\delta$  147.95 (s), 146.40 (s), 144.10 (s), 130.29 (s), 128.04 (s), 123.41 (s), 119.85 (s), 115.82 (s), 115.36 (s), 111.83 (s).

HR-MS (EI)  $m/z$  calculated for  $[M+H, C_{12}H_{12}BrN_2]^+$ : 263.0181; found: 263.0178.

### Procedure for the preparation of COP-DTAD

To a mixture of 5-bromo-[1,1'-biphenyl]-3,4'-diamine (1.82 g, 6.95 mmol), 4,4'-((4-(4,4,5,5-tetramethyl-1,3,2-dioxaborolan-2-yl)phenyl)azanediyl)dibenzaldehyde (compound 2, 3.00 g, 7.02 mmol),  $K_3PO_4$  (4.43 g, 20.87 mmol) and  $Pd(PPh_3)_4$  (0.40 g, 0.35 mmol), a degassed mixture of 1,4-dioxane (150 mL) and  $H_2O$  (8 mL) was

added. The mixture was heated at 90 °C for 24 h under the protection of nitrogen. The reaction solution was filtered through celite, and a clear golden liquid was obtained. The solvent was quickly removed in a 50 °C water bath under vacuum to afford COP-DTAD as a lumpy golden solid (3.04 g), which was insoluble in common organic solvents such as ethyl acetate, dichloromethane, tetrahydrofuran, 1,4-dioxane and dimethylacetamide, etc. Anal. Calcd. for chemical formula  $C_9H_6N_9$ : C, 85.88; H, 4.73; N, 9.39. Found: C, 80.09; H, 5.29; N, 8.15.

#### **Procedure for the preparation of COP-DTAD-1**

COP-DTAD (100 mg) was added to a mixture of *o*-dichlorobenzene (0.5 mL), *n*-butanol (0.5 mL), and acetic acid (6 M (aq.), 0.1 mL) in a glass ampoule. The ampoule was degassed through three freeze-pump-thaw cycles and then flame-sealed. After being heated at 120 °C for three days in an oven, the ampoule was opened and the resulting precipitate was collected through filtration, and washed three times with anhydrous THF to afford a yellow powder, which was further immersed in anhydrous THF for 3 times and then dried under dynamic vacuum at 120 °C for 2 h to give COP-DTAD-1 (76.2 mg, 76%). It is insoluble in common organic solvents such as ethyl acetate, dichloromethane, tetrahydrofuran, 1,4-dioxane and dimethylacetamide, etc. Anal. Calcd. for chemical formula  $C_9H_6N_9$ : C, 85.88; H, 4.73; N, 9.39. Found: C, 80.41; H, 4.97; N, 8.60.

#### **Procedure for the preparation of COF-DTAD**

COP-DTAD (100 mg) and aniline (27.2  $\mu$ L) were added to a mixture of *o*-dichlorobenzene (0.5 mL), *n*-butanol (0.5 mL), and acetic acid (6 M (aq.), 0.1 mL) in a glass ampoule. The ampoule was degassed through three freeze-pump-thaw cycles, flame-sealed, and heated at 120 °C for three days in an oven. After being cooled to room temperature, the resulting precipitate was collected through filtration, washed three times with anhydrous THF, and the as-obtained powder was immersed in anhydrous THF for 3 times and then dried under dynamic vacuum at 120 °C for 2 h

to afford COF-DTAD as a yellow powder (70.6 mg, 71%). COF-DTAD is insoluble in common organic solvents such as ethyl acetate, dichloromethane, tetrahydrofuran, 1,4-dioxane and dimethylacetamide, etc. Anal. Calcd. for chemical formula  $C_9H_6N_9$ : C, 85.88; H, 4.73; N, 9.39. Found: C, 83.24; H, 4.74; N, 9.10.

For the studies using different equivalents of aniline or different time, the above procedure was followed.

Reference for the synthesis:

- 1 Z.-J. Yin, S.-Q. Xu, T.-G. Zhan, Q.-Y. Qi, Z.-Q. Wu and X. Zhao, *Chem. Commun.*, 2017, **53**, 7266-7269.

## Section C Characterization of COP-DTAD, COP-DTAD-1, and COF-DTAD

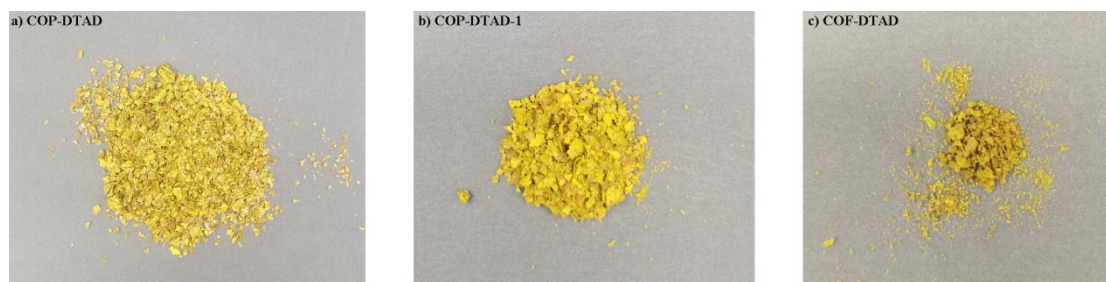

**Fig. S1** Photographs of (a) COP-DTAD, (b) COP-DTAD-1, and (c) COF-DTAD.

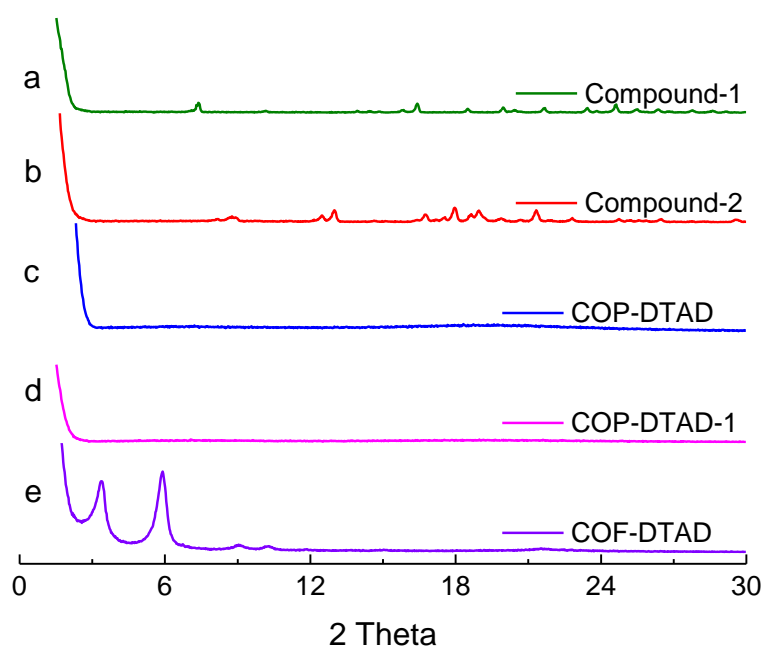

**Fig. S2** PXRD patterns of (a) compound **1**, (b) compound **2**, (c) COP-DTAD, (d) COP-DTAD-1, and (e) COF-DTAD.

**Table S1.** Attempts to converting COP-DTAD to COF-DTAD in different solvents without aniline additive.

| Entry | Solvent (1 mL)                      | Catalyst (0.1 mL) | Temperature | Time |
|-------|-------------------------------------|-------------------|-------------|------|
| 1     | Mes/ <i>n</i> -BuOH = 1/1           |                   |             |      |
| 2     | Mes                                 |                   |             |      |
| 3     | <i>n</i> -BuOH                      |                   |             |      |
| 4     | <i>o</i> -DCB/ EtOH = 1/1           |                   |             |      |
| 5     | Mes/ Dio = 1/1                      |                   |             |      |
| 6     | <i>o</i> -DCB/ <i>n</i> -BuOH = 1/1 | 6.0 mol/L HOAc    |             | 72 h |
| 7     | Dio                                 | 120 °C            |             |      |
| 8     | DMSO/ Mes = 1/1                     |                   |             |      |
| 9     | DMSO/ <i>o</i> -DCB = 1/1           |                   |             |      |
| 10    | <i>o</i> -DCB/ <i>t</i> -BuOH = 1/1 |                   |             |      |
| 11    | <i>o</i> -DCB/ <i>i</i> -PrOH = 1/1 |                   |             |      |
| 12    | <i>o</i> -DCB/ glycol = 1/1         |                   |             |      |

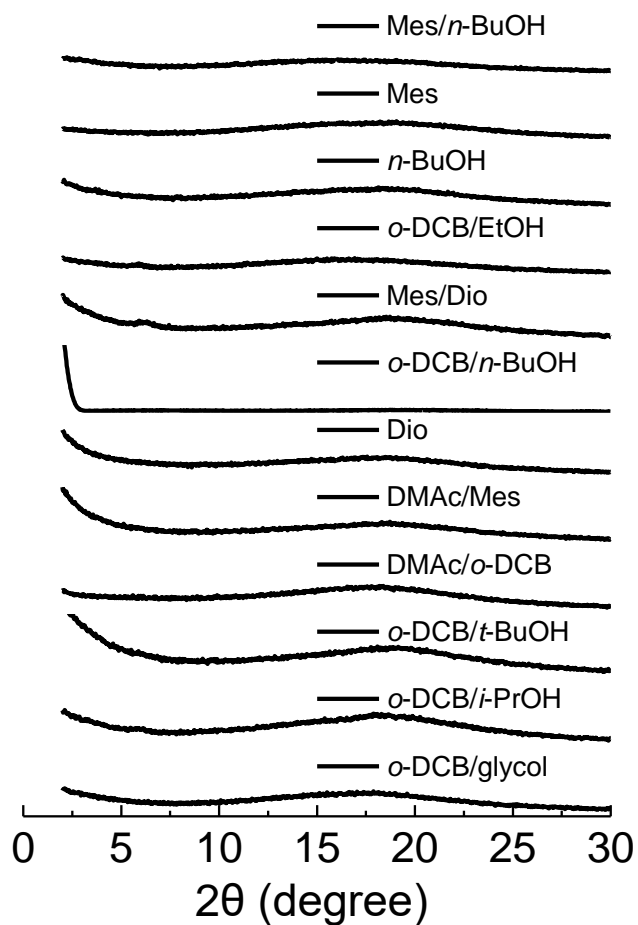

**Fig. S3** PXRD patterns of the polymers obtained by heating COP-DTAD in different solvents.



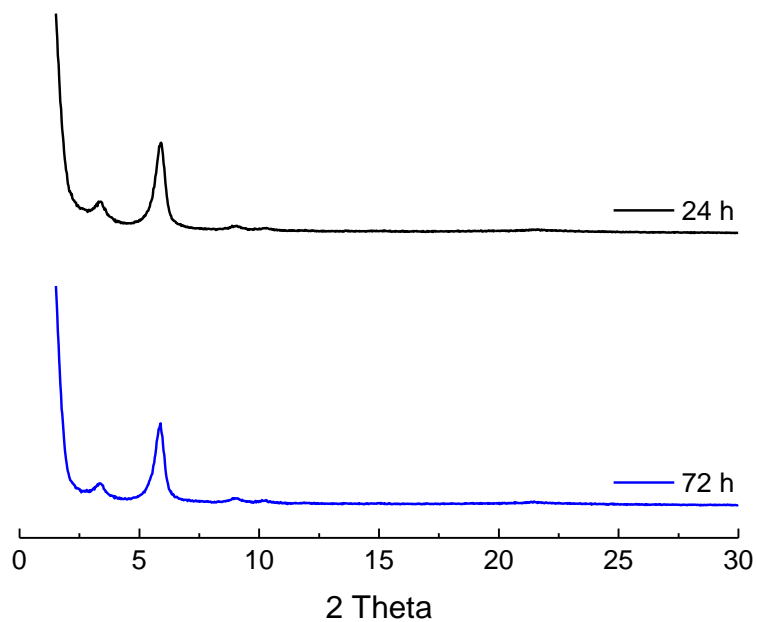

**Fig. S4** PXRD patterns of COF-DTAD prepared by heating mixtures of COP-DTAD and 4 equivalents of aniline for 24 h and 72 h, respectively.

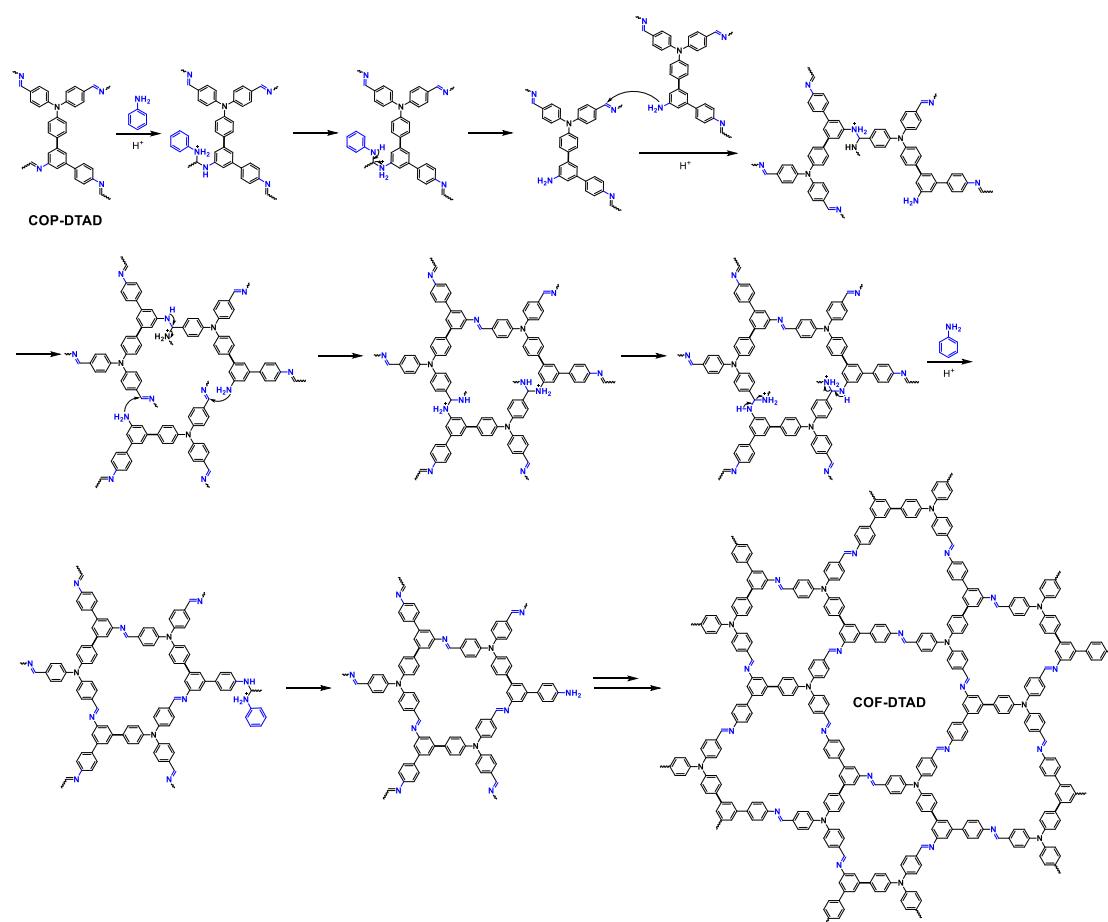

**Scheme S1** The proposed mechanism for the conversion from COP-DTAD to COF-DTAD.

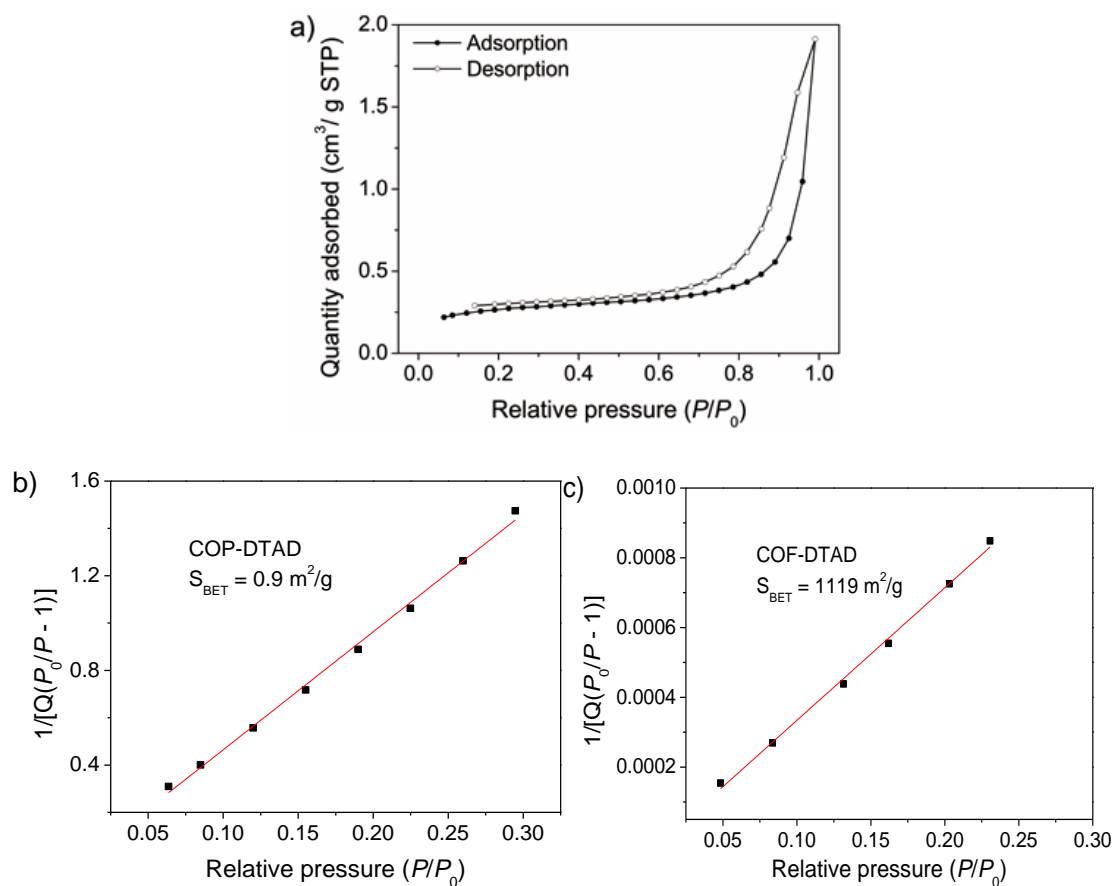

**Fig. S5** (a)  $N_2$  adsorption-desorption isotherm (77 K) of COP-DTAD, and BET surface area plots for (b) COP-DTAD and (c) COF-DTAD calculated from their adsorption data.

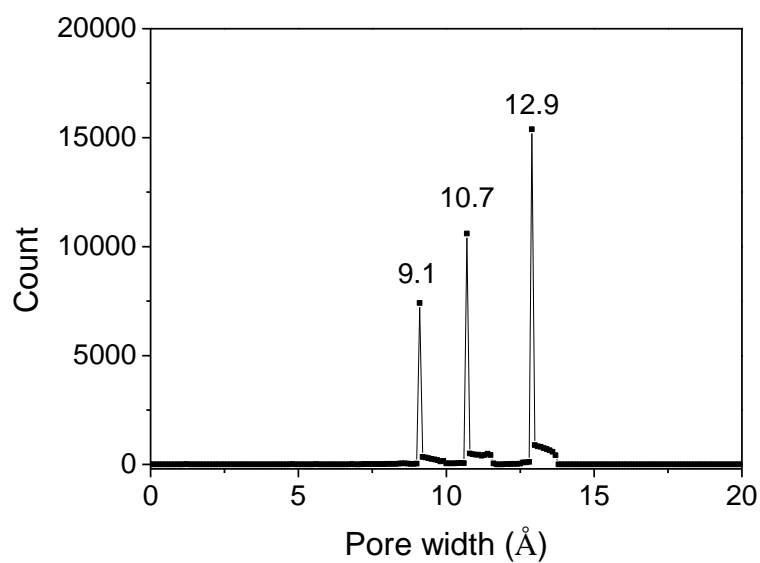

**Fig. S6** Illustration of the theoretical pore size distribution for COF-DTAD with eclipsed AA stacking based on Zeo++ calculations.

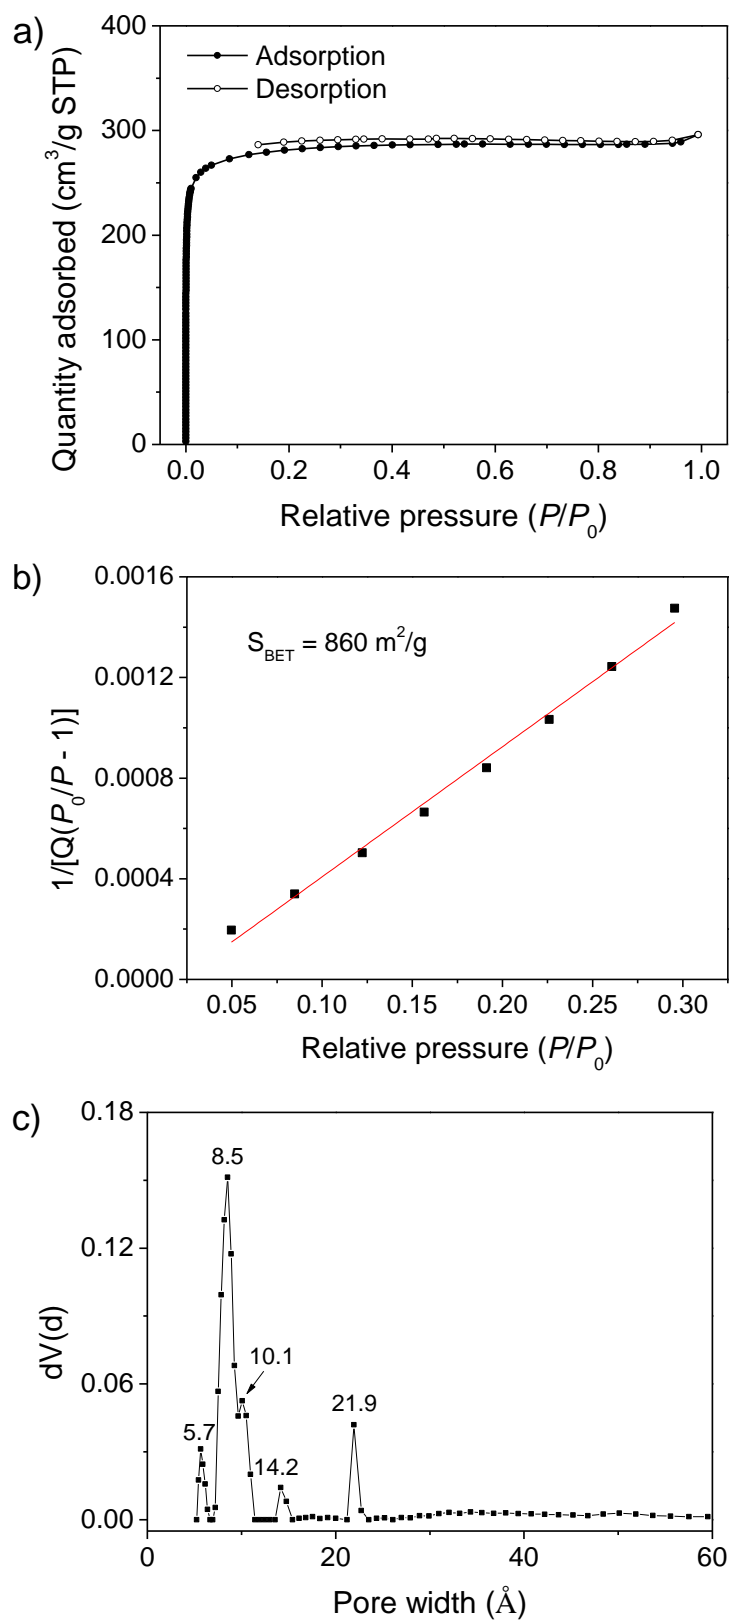

**Fig. S7** (a) N<sub>2</sub> adsorption–desorption isotherm (77 K), (b) BET surface area plot, and (c) pore size distribution profile of COP-DTAD-1 calculated from the adsorption data.

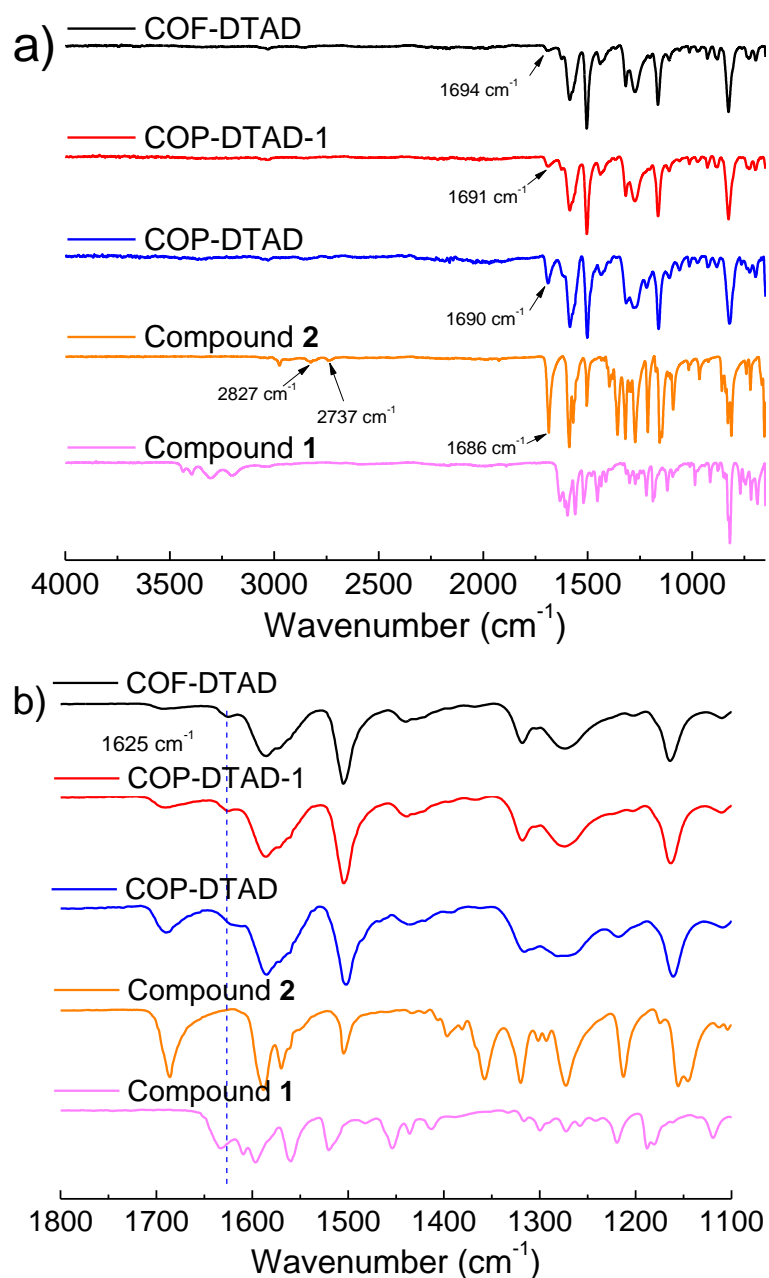

**Fig. S8** FT-IR spectra of compound **1**, compound **2**, COP-DTAD, COP-DTAD-1, and COF-DTAD at the wavenumber of (a) 4000–650  $\text{cm}^{-1}$  and (b) 1800–1100  $\text{cm}^{-1}$ .

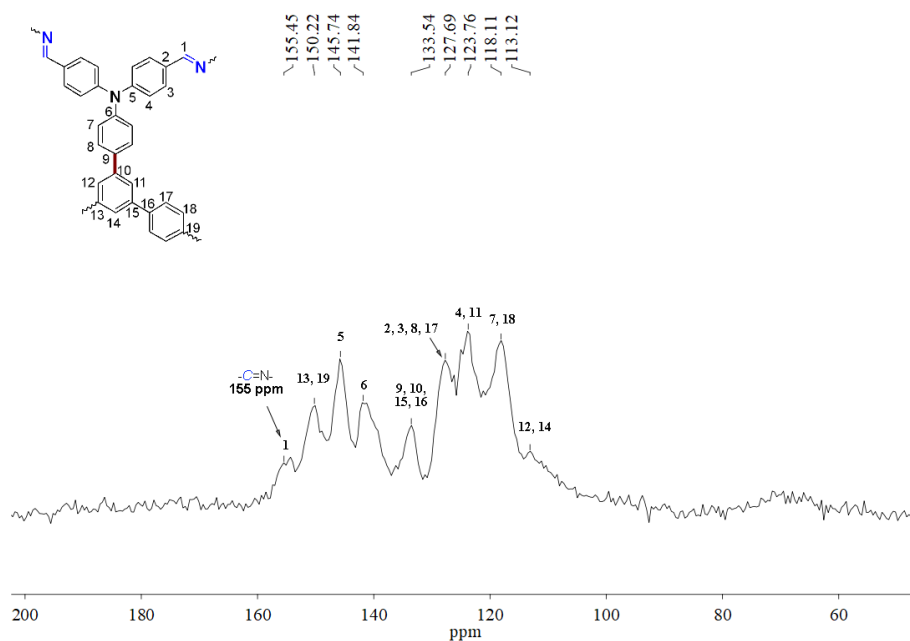

**Fig. S9** Solid-state  $^{13}\text{C}$  CP/MAS NMR spectrum of COF-DTAD.

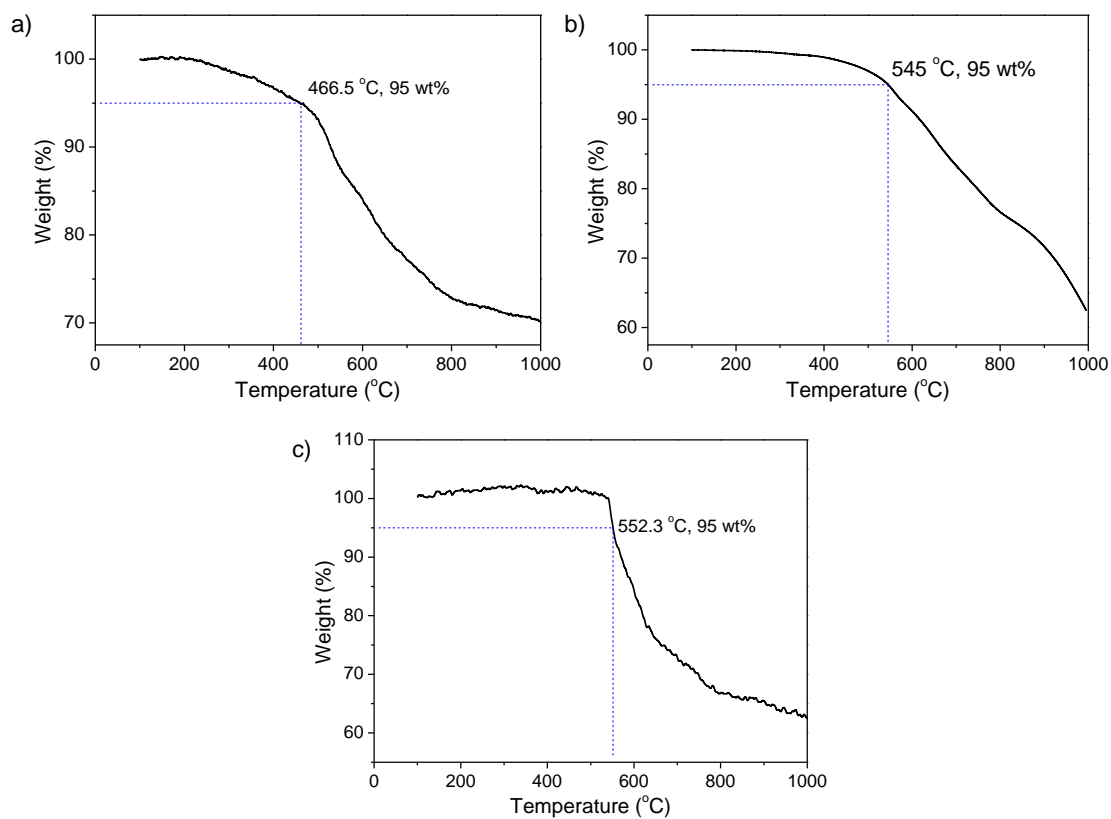

**Fig. S10** TGA profiles of (a) COP-DTAD, (b) COP-DTAD-1, and (c) COF-DTAD.

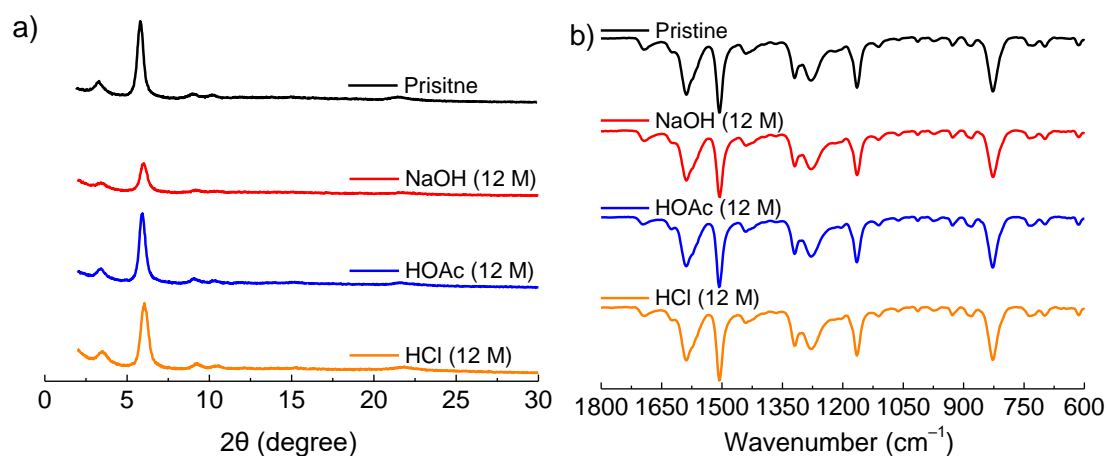

**Fig. S11** (a) PXRD patterns and (b) FT-IR spectra of COF-DTAD upon treatment in aqueous solutions of HOAc (12 M), HCl (12 M), and NaOH (12 M) at 25 °C for 3 days, respectively.

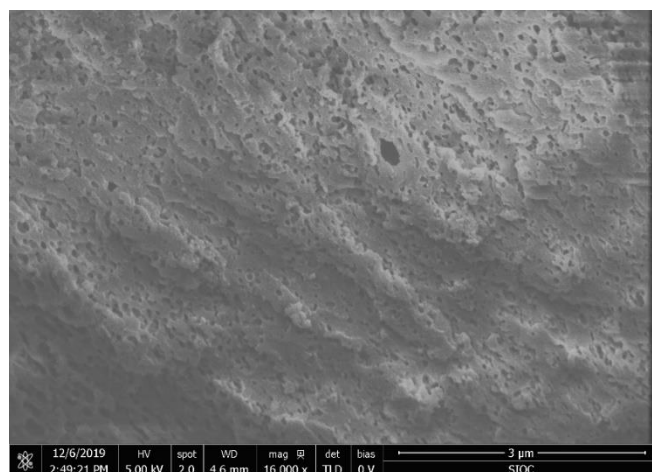

**Fig. S12** Field-emission SEM image of COP-DTAD.

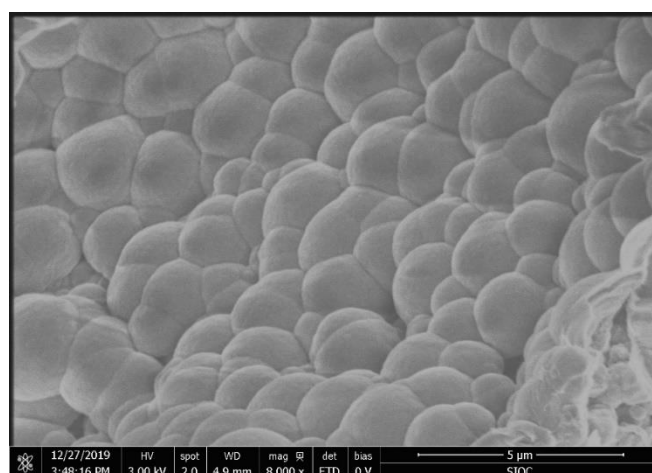

**Fig. S13** Field-emission SEM image of COF-DTAD.

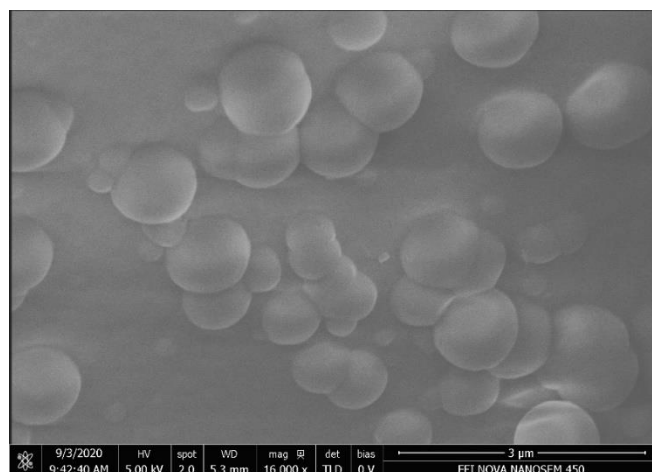

**Fig. S14** Field-emission SEM image of COP-DTAD-1.

## Section D Fractional atomic coordinates

**Table S2** The space groups and cell parameters of the predicted structures of COF-DTAD with AA and AB stacking.

| Structure | Space Group | Cell Parameters                                                                                             |
|-----------|-------------|-------------------------------------------------------------------------------------------------------------|
| AA        | P3          | $a = b = 29.98 \text{ \AA}$ , $c = 4.13 \text{ \AA}$ , $\alpha = \beta = 90^\circ$ and $\gamma = 120^\circ$ |
| AB        | P3(C3-1)    | $a = b = 29.98 \text{ \AA}$ , $c = 8.26 \text{ \AA}$ , $\alpha = \beta = 90^\circ$ and $\gamma = 120^\circ$ |

**Table S3** Fractional atomic coordinates for the unit cell of COF-DTAD with AA stacking.

| P3                                                                                                                                                            |        |         |          |          |         |        |         |          |          |
|---------------------------------------------------------------------------------------------------------------------------------------------------------------|--------|---------|----------|----------|---------|--------|---------|----------|----------|
| $a = b = 29.98 \text{ \AA}$ , $c = 4.13 \text{ \AA}$ , $\alpha = \beta = 90^\circ$ and $\gamma = 120^\circ$ (residuals $R_p = 3.81 \%$ , $R_{wp} = 5.52 \%$ ) |        |         |          |          |         |        |         |          |          |
| Element                                                                                                                                                       | Number | x       | y        | z        | Element | Number | x       | y        | z        |
| 1                                                                                                                                                             | C      | 1.58523 | -0.16168 | 0.18302  | 29      | C      | 0.97536 | -0.3386  | -0.0828  |
| 2                                                                                                                                                             | C      | 1.58058 | -0.21012 | 0.15577  | 30      | C      | 1.35254 | -0.58262 | 0.06558  |
| 3                                                                                                                                                             | C      | 1.65436 | -0.17457 | -0.20123 | 31      | C      | 1.45077 | -0.49355 | 0.08281  |
| 4                                                                                                                                                             | C      | 1.65842 | -0.12641 | -0.17604 | 32      | C      | 1.39269 | -0.5814  | 0.24783  |
| 5                                                                                                                                                             | C      | 1.62446 | -0.11891 | 0.01938  | 33      | C      | 1.44143 | -0.53765 | 0.25362  |
| 6                                                                                                                                                             | N      | 1.62911 | -0.06846 | 0.04674  | 34      | C      | 1.41062 | -0.49363 | -0.0915  |
| 7                                                                                                                                                             | C      | 1.60631 | -0.36369 | -0.08437 | 35      | C      | 1.36226 | -0.53774 | -0.10114 |
| 8                                                                                                                                                             | C      | 1.65456 | -0.31877 | -0.0724  | 36      | H      | 1.55808 | -0.15778 | 0.3329   |
| 9                                                                                                                                                             | C      | 1.65701 | -0.27094 | -0.05164 | 37      | H      | 1.55064 | -0.24187 | 0.29167  |
| 10                                                                                                                                                            | C      | 1.61201 | -0.26765 | -0.05478 | 38      | H      | 1.68112 | -0.17884 | -0.35624 |
| 11                                                                                                                                                            | C      | 1.56404 | -0.31297 | -0.06833 | 39      | H      | 1.68843 | -0.09486 | -0.3079  |
| 12                                                                                                                                                            | C      | 1.56108 | -0.36086 | -0.07137 | 40      | H      | 1.60382 | -0.40081 | -0.10767 |
| 13                                                                                                                                                            | N      | 1.51153 | -0.40619 | -0.05927 | 41      | H      | 1.69401 | -0.23619 | -0.02482 |
| 14                                                                                                                                                            | C      | 1.70237 | -0.3216  | -0.07334 | 42      | H      | 1.52877 | -0.31131 | -0.07    |
| 15                                                                                                                                                            | C      | 1.61544 | -0.21691 | -0.03464 | 43      | H      | 1.67149 | -0.39097 | 0.21946  |
| 16                                                                                                                                                            | C      | 1.70457 | -0.36162 | 0.08992  | 44      | H      | 1.75168 | -0.39374 | 0.22748  |
| 17                                                                                                                                                            | C      | 1.75027 | -0.36311 | 0.09748  | 45      | H      | 1.82593 | -0.25517 | -0.34474 |
| 18                                                                                                                                                            | C      | 1.7946  | -0.32403 | -0.04915 | 46      | H      | 1.74561 | -0.25333 | -0.36975 |
| 19                                                                                                                                                            | C      | 1.79243 | -0.28463 | -0.2189  | 47      | H      | 1.53287 | -0.45013 | 0.21692  |
| 20                                                                                                                                                            | C      | 1.74656 | -0.28362 | -0.23252 | 48      | H      | 1.89011 | -0.24714 | 0.03141  |
| 21                                                                                                                                                            | N      | 1.84127 | -0.32556 | -0.02677 | 49      | H      | 1.05714 | -0.22105 | 0.24165  |
| 22                                                                                                                                                            | C      | 1.50255 | -0.44827 | 0.0853   | 50      | H      | 0.98008 | -0.21425 | 0.22276  |
| 23                                                                                                                                                            | C      | 1.88629 | -0.28486 | 0.00317  | 51      | H      | 0.89612 | -0.36639 | -0.19029 |
| 24                                                                                                                                                            | C      | 1.02203 | -0.29829 | 0.04001  | 52      | H      | 0.97224 | -0.37394 | -0.1674  |
| 25                                                                                                                                                            | C      | 1.02249 | -0.25357 | 0.15127  | 53      | H      | 1.38677 | -0.61482 | 0.37872  |
| 26                                                                                                                                                            | C      | 0.97836 | -0.24924 | 0.1375   | 54      | H      | 1.47182 | -0.53827 | 0.3919   |
| 27                                                                                                                                                            | C      | 0.93243 | -0.28978 | 0.01645  | 55      | H      | 1.41667 | -0.46002 | -0.22591 |
| 28                                                                                                                                                            | C      | 0.93117 | -0.33455 | -0.09328 | 56      | H      | 1.33262 | -0.53661 | -0.24101 |



Section E  $^1\text{H}$  NMR and  $^{13}\text{C}$  NMR spectra of compound **1**

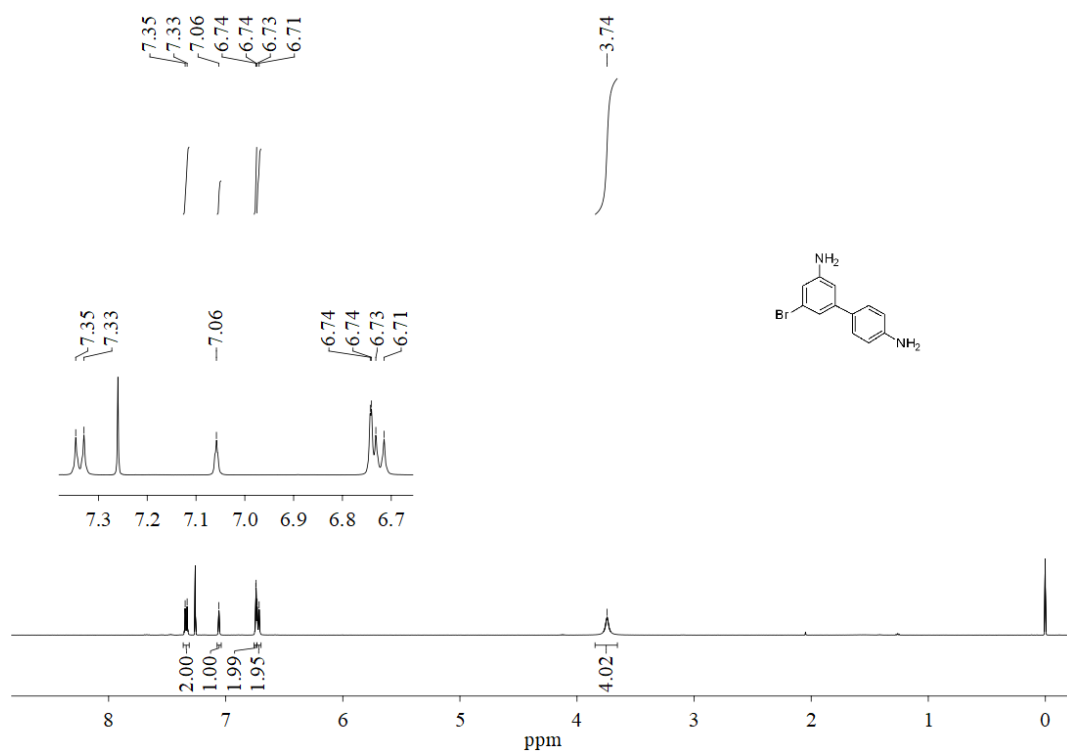

**Fig. S15**  $^1\text{H}$  NMR spectrum (500 MHz,  $\text{CDCl}_3$ , 25  $^\circ\text{C}$ ) of compound **1**.

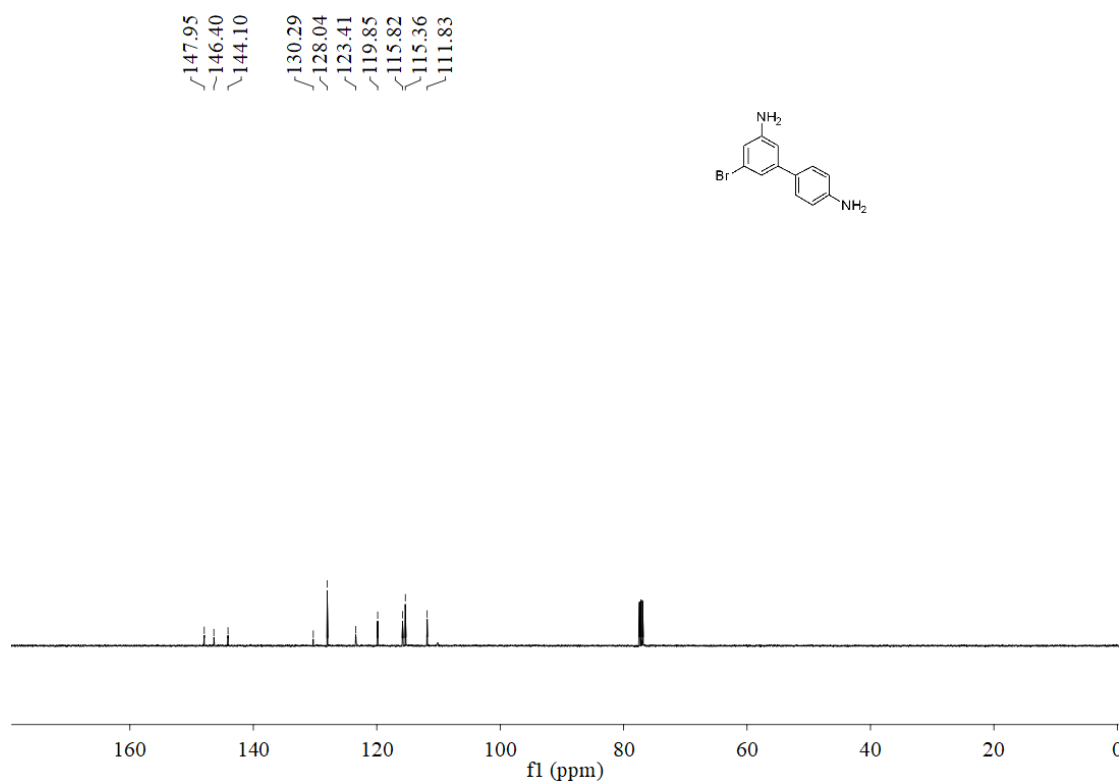

**Fig. S16**  $^{13}\text{C}$  NMR (126 MHz,  $\text{CDCl}_3$ , 25  $^\circ\text{C}$ ) spectrum of compound **1**.
